# Supplementary material for: Establishment and Validation of a Serum-Free Suspension Culture Process Using MDBK Cells for Efficient Production of OPIV3
Source: Research Square preprint supplement (doi:10.21203/rs.3.rs-7782639/v1), 2025-10-28
Supplement: Supplementary file 1 [file 1ff3b306c04013d61d756e3b.docx]

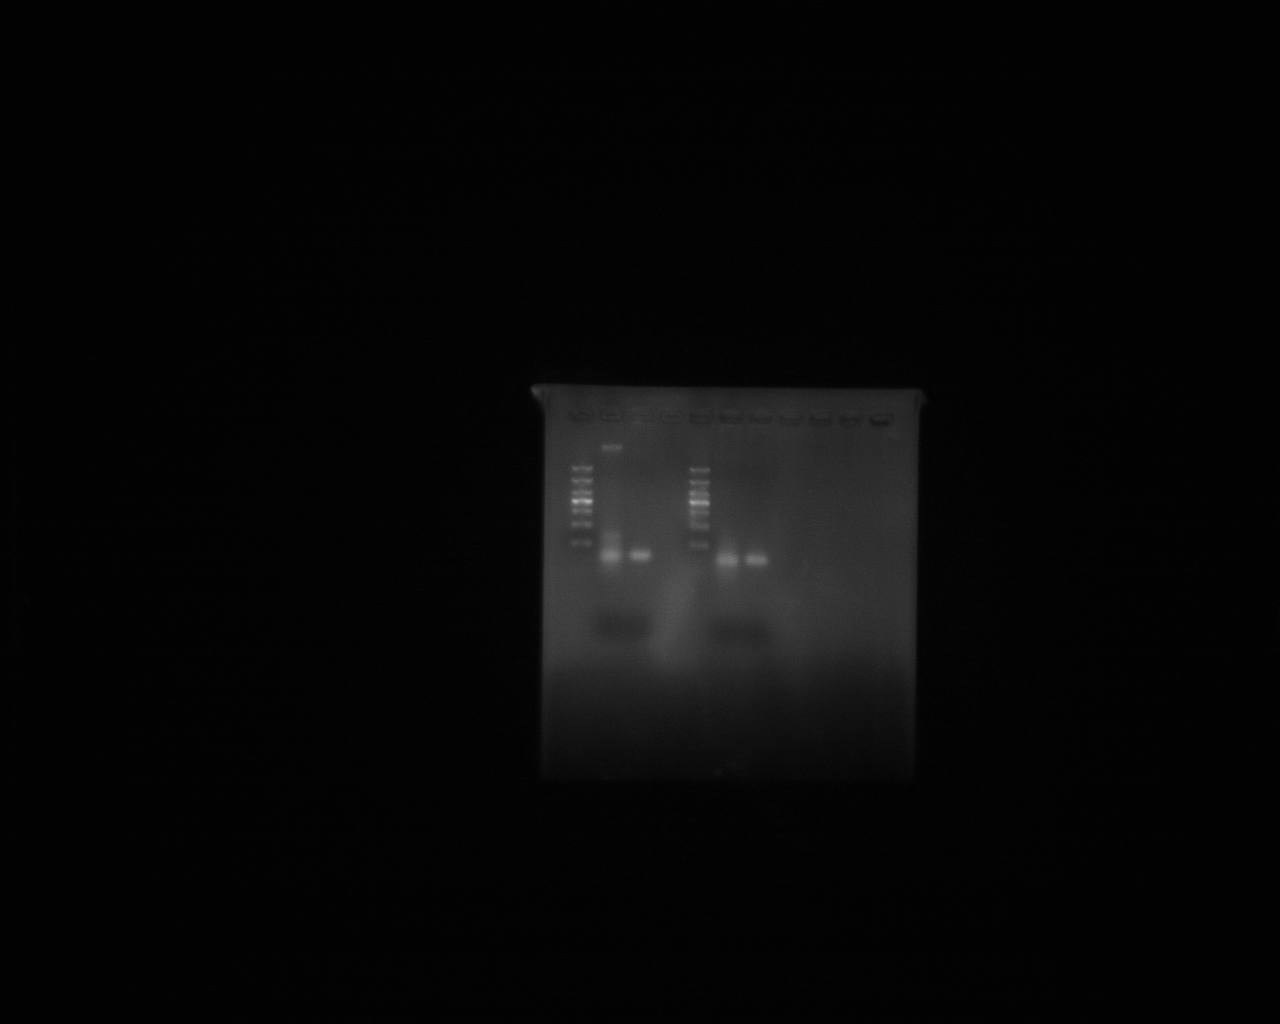


M1 1 2 3 M2 4 5

Figure 14: M1, M2: DL500 DNA Marker; Lane 1: Genomic DNA from other cell lines; Lane 2: Negative control; Lane 3: No template control; Lane 4: Genomic DNA from suspension-cultured MDBK cells; Lane 5: Negative control
